# Supplementary material for: Rhodiola extract promotes longevity and stress resistance of Caenorhabditis elegans via DAF-16 and SKN-1
Source: Royal Society of Chemistry journal article supplement (doi:10.1039/d0fo02974b), 2021-01-01
Supplement: d0fo02974b1.pdf [file d0fo02974b1.pdf]

**Table S1** Primers used for quantitative RT-PCR analysis

| Gene           | Forward primer (5'-3') | Reverse primer (5'-3')       |
|----------------|------------------------|------------------------------|
| <i>β-actin</i> | GTCAGTGGTGGACCTGACCT   | AGGGGTCTACATGGCAACTG         |
| <i>sod-3</i>   | GGCTAAGGATGGTGGAGAAC   | ACAGGTGGCGATCTTCAAG          |
| <i>gst-4</i>   | ATGCTCGTGCTCTTGCTGAG   | GACTGACCGAATTGTTCTCCAT       |
| <i>daf-16</i>  | TCAAGCCAATGCCACTACC    | TGGAAGAGCCGATGAAGAAG         |
| <i>skn-1</i>   | CACGCCGTCAGCGAAGTA     | ATGCTCGGTGAGTATTGG           |
| <i>daf-2</i>   | GCGGATACACAGCAAGAATAAC | GAGCCACAAGCACCAGAAC          |
| <i>age-1</i>   | CCTGAACCGACTGCCAATC    | GTGCTTGACGAGATATGCGTATT<br>G |

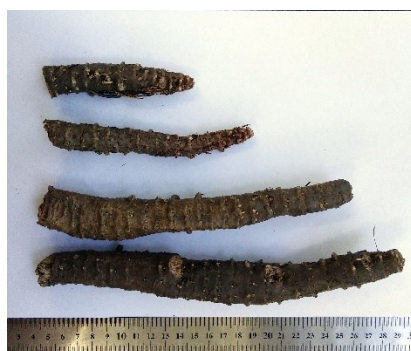

**Figure S1** The morphology of *Rhodiola* used in the present study.
